# Supplementary material
Source: PubMed Central journal article supplement (PMC138571)

A

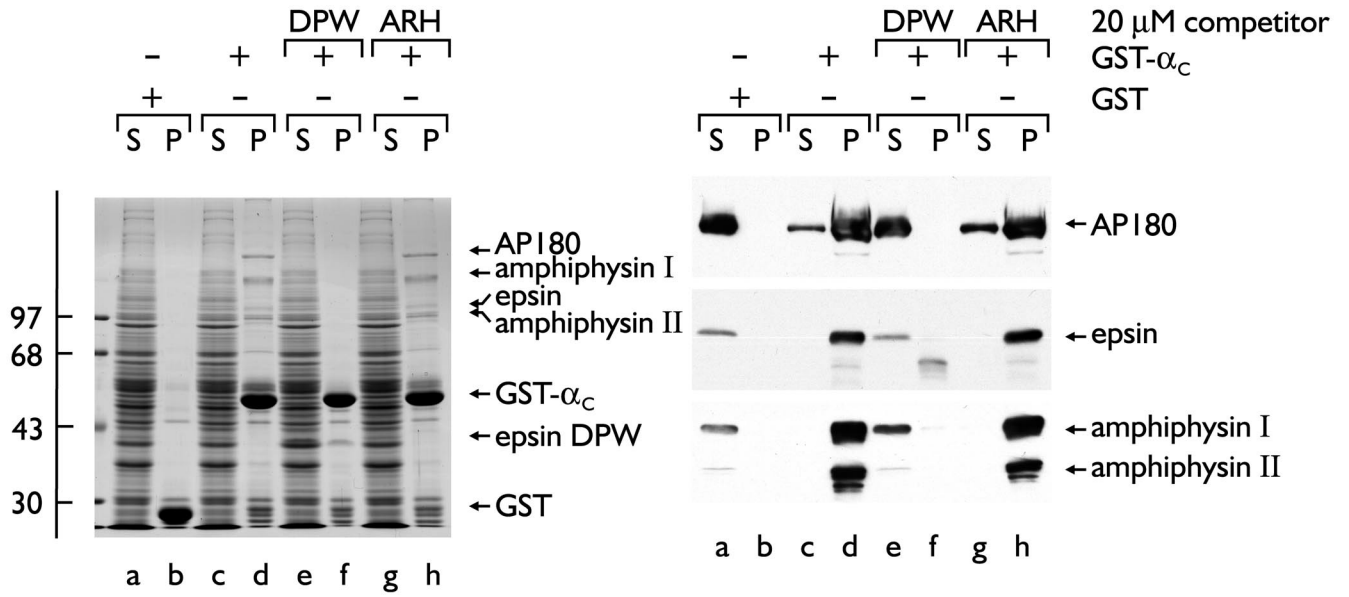

B

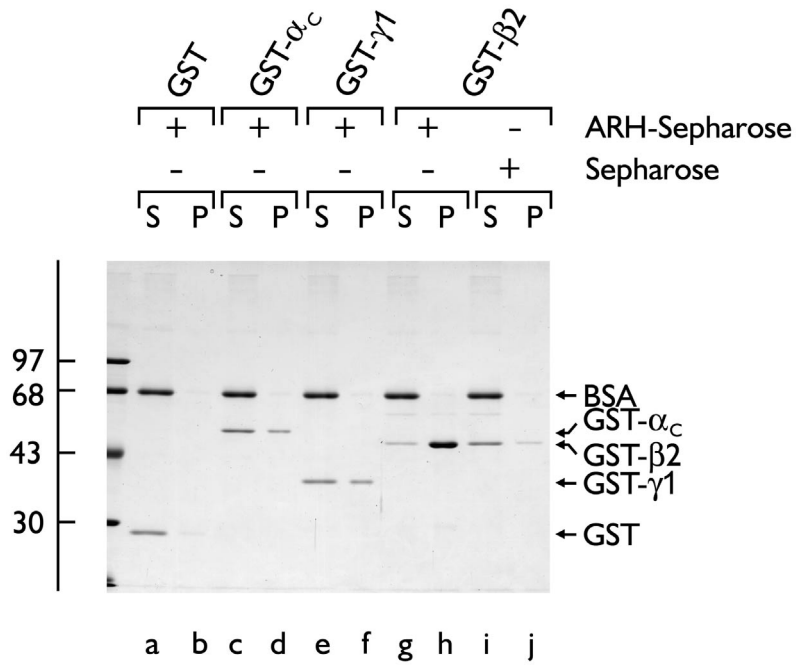

Supplement: pnas_252630799_3.pdf [file pnas_252630799_3.pdf]

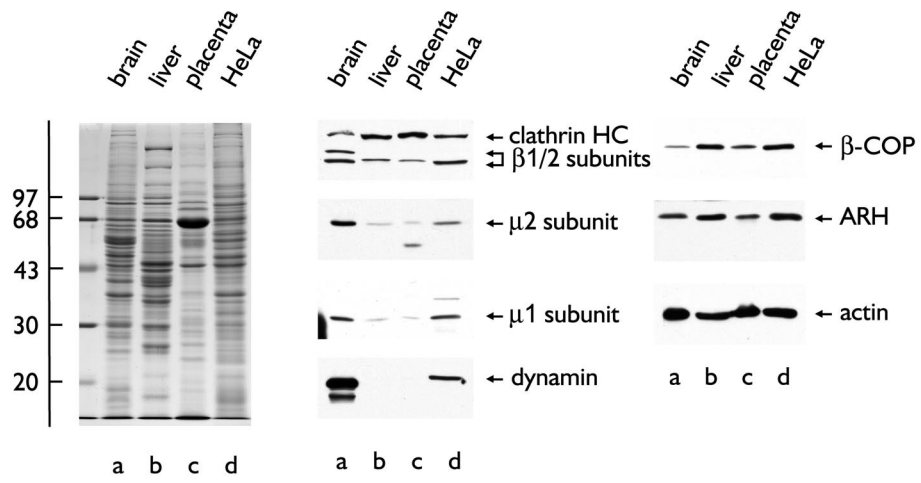

Supplement: pnas_252630799_5.pdf [file pnas_252630799_5.pdf]
